# Supplementary material
Source: HighWire-hosted journal article supplement (https://bibliotheek.ehb.be/content/89/2/127)
Supplement: inline-supplementary-material-2 [file inline-supplementary-material-2.pdf]

**Supplementary Table 3: Clinical phenotype of initial presentation and all episodes through the disease course**

**Clinical phenotype at initial presentation**

| Clinical Phenotype | Total Cohort (n=59) | Pediatric patients (n=33)                                                                               | Adult patients (n=26)                                                                                    |
|--------------------|---------------------|---------------------------------------------------------------------------------------------------------|----------------------------------------------------------------------------------------------------------|
| BON                | 19/59 (32%)         | 8/33 (24%)                                                                                              | 11/26 (42%)                                                                                              |
| UON                | 13/59 (22%)         | 5/33 (15%)                                                                                              | 8/26 (31%)                                                                                               |
| ADEM               | 12/59 (20%)         | 12/33 (36%)                                                                                             | 0/26 (0%)                                                                                                |
| Mixed              | 7/59 (12%)          | 4/33 (12%)<br><i>ADEM + LETM,<br/>BON + LETM,<br/>UON + LETM,<br/>LETM + brainstem<br/>+ cerebellar</i> | 3/26 (12%)<br><i>UON + LETM, UON<br/>+ short TM +<br/>brainstem, UON +<br/>sensory (non-<br/>spinal)</i> |
| Short TM           | 2/59 (3%)           | 0/33 (0%)                                                                                               | 2/26 (8%)                                                                                                |
| LETM               | 2/59 (3%)           | 1/33 (3%)                                                                                               | 1/26 (4%)                                                                                                |
| Seizures           | 2/59 (3%)           | 2/33 (6%)                                                                                               | 0/26 (0%)                                                                                                |
| Other              | 2/59 (3%)           | 1/33 (3%)<br><i>non encephalitic<br/>acute<br/>demyelinating<br/>syndrome</i>                           | 1/26 (4%)<br><i>sensory (non-<br/>spinal)</i>                                                            |

**Clinical phenotype of all episodes through the disease course**

| Clinical Phenotype | Total Cohort (n=218) | Pediatric patients (n=112)                                                                                                                                                                                                                                                | Adult patients (n=106)                                                                                                                                                                                        |
|--------------------|----------------------|---------------------------------------------------------------------------------------------------------------------------------------------------------------------------------------------------------------------------------------------------------------------------|---------------------------------------------------------------------------------------------------------------------------------------------------------------------------------------------------------------|
| UON                | 76/218 (35%)         | 32/112 (29%)                                                                                                                                                                                                                                                              | 44/106 (42%)                                                                                                                                                                                                  |
| BON                | 42/218 (19%)         | 19/112 (17%)                                                                                                                                                                                                                                                              | 23/106 (22%)                                                                                                                                                                                                  |
| Mixed              | 26/218 (12%)         | 18/112 (16%)<br><i>5 episodes of<br/>ADEM +LETM, 2<br/>episodes of ADEM<br/>+ UON, 2 episodes<br/>of ADEM +<br/>cerebellar, 1<br/>episode of each of<br/>the following:<br/>ADEM + BON,<br/>ADEM + LETM +<br/>brainstem, ADEM<br/>+ cerebellar +<br/>brainstem, BON +</i> | 8/106 (8%)<br><i>3 episodes of BON<br/>+ LETM, 2 episodes<br/>of UON + LETM, 1<br/>episode of each of<br/>the following:<br/>ADEM + UON, UON<br/>+ short TM +<br/>brainstem, UON +<br/>sensory non spinal</i> |

|            |             |                                                                                                                                                                                                                                   |                                                                               |
|------------|-------------|-----------------------------------------------------------------------------------------------------------------------------------------------------------------------------------------------------------------------------------|-------------------------------------------------------------------------------|
|            |             | <i>LETM, UON +<br/>LETM, UON +<br/>seizures, LETM +<br/>brainstem, LETM +<br/>brainstem +<br/>cerebellar,<br/>brainstem +<br/>cerebellar</i>                                                                                      |                                                                               |
| ADEM       | 19/218 (9%) | 17/112 (15%)                                                                                                                                                                                                                      | 2/106 (2%)                                                                    |
| Short TM   | 12/218 (6%) | 1/112 (1%)                                                                                                                                                                                                                        | 11/106 (10%)                                                                  |
| LETM       | 10/218 (5%) | 4/112 (4%)                                                                                                                                                                                                                        | 6/106 (6%)                                                                    |
| Brainstem  | 8/218 (4%)  | 4/112 (4%)                                                                                                                                                                                                                        | 4/106 (4%)                                                                    |
| Seizures   | 6/218 (3%)  | 6/112 (5%)                                                                                                                                                                                                                        | 0/106 (0%)                                                                    |
| Cerebellar | 4/218 (2%)  | 2/112 (2%)                                                                                                                                                                                                                        | 2/106 (2%)                                                                    |
| Other      | 15/218 (7%) | 9/112 (8%)                                                                                                                                                                                                                        | 6/106 (6%)                                                                    |
|            |             | <i>8 episodes of non-encephalitic acute demyelinating syndromes (5 with brainstem and cerebellar, 1 with tremor, 1 with left hemiplegia, 1 with aphasia and right hemiplegia), 1 with seizures + acute demyelinating syndrome</i> | <i>4 episodes of sensory (non-spinal), 2 episodes of cognitive impairment</i> |

ADEM acute disseminated encephalomyelitis; BON bilateral optic neuritis; LETM longitudinally extensive transverse myelitis; TM transverse myelitis; UON unilateral optic neuritis
