# Supplementary material
Source: HighWire-hosted journal article supplement (https://bibliotheek.ehb.be/content/89/2/127)
Supplement: inline-supplementary-material-5 [file inline-supplementary-material-5.pdf]

**Supplementary Table 6: Recovery status based on clinical phenotype**

|            | <b>Complete Recovery (CR)</b> | <b>Partial Recovery (PR)</b> | <b>No Recovery (NR)</b> |
|------------|-------------------------------|------------------------------|-------------------------|
| ADEM       | 7/16 (44%)                    | 9/16 (56%)                   | 0/16 (0%)               |
| BON        | 21/37 (57%)                   | 16/37 (43%)                  | 0/37 (0%)               |
| UON        | 35/69 (51%)                   | 30/69 (43%)                  | 4/69 (6%)               |
| LETM       | 1/10 (10%)                    | 9/10 (90%)                   | 0/10 (0%)               |
| Short TM   | 2/12 (17%)                    | 10/12 (83%)                  | 0/12 (0%)               |
| Brainstem  | 4/7 (57%)                     | 3/7 (43%)                    | 0/7 (0%)                |
| Cerebellar | 1/4 (25%)                     | 3/4 (75%)                    | 0/4 (0%)                |
| Seizures   | 2/3 (67%)                     | 1/3 (33%)                    | 0/3 (0%)                |
| Mixed      | 7/22 (32%)                    | 14/22 (63%)                  | 1/22 (5%)               |
| Other      | 3/10 (30%)                    | 7/10 (70%)                   | 0/10 (0%)               |

ADEM acute disseminated encephalomyelitis; BON bilateral optic neuritis; LETM longitudinally extensive transverse myelitis; TM transverse myelitis; UON unilateral optic neuritis
